# Supplementary material for: Prevalent coordination of mitochondrial DNA transcription and initiation of replication with the cell cycle
Source: PubMed Central journal article supplement — Nucleic Acids Res. 2013 Jan 23;41(5):3068–78. doi: 10.1093/nar/gkt015 (PMC3597681; doi:10.1093/nar/gkt015), 2013-01-23
Supplement: supp_gkt015_nar-01757-m-2012-File009.pdf [file supp_gkt015_nar-01757-m-2012-File009.pdf]

## Supplementary material

### Supplementary Results

#### **Altered nuclear and mitochondrial parameters after cell cycle blockage by double thymidine.**

Treatment with double thymidine resulted in about 2-fold higher levels of PCNA immunostaining and at least 2 to 4-fold higher levels of mREP (Supplementary Figure S5A) indicating enhanced activity of DNA synthesis both at the nuclear and organelle level compared to serum starvation. Higher levels of mREP were associated with larger amounts of mtDNA (about 5-folds) as it appeared from q-PCR analysis (Supplementary Figure S5A), although the mitochondrial mass (TOM22 immunolabeling, Figure 5C) was not significantly altered compared to serum starvation (Figure 2E). Interestingly, the ratio of 7S DNA to mtDNA was globally close to 1 (from 0.71 to 1.38) in all phases of the cell cycle after serum starvation whereas it was always  $>1$  (from 1.22 to 1.85) after double thymidine treatment (Supplementary Figure S5A), indicating that in the latter only a minority of events of initiation of replication extend beyond the 7S region. Finally, mTRANS levels were 2 to 4-fold larger after double thymidine treatment than after serum starvation (Supplementary Figure S5B); this was also the case for mitochondrial transcripts assessed by RT-qPCR (about 15-fold higher levels of *16S* and *CytB* in G1, and until 38-fold higher levels of *16S* during the S-phase), indicating that not only DNA synthesis but also transcript levels globally increased in mitochondria after double thymidine treatment.

#### **Altered mitochondrial parameters after cell cycle blockage by nocodazole**

Nocodazole arrests cells in G2/M. During blockage of the cell cycle by nocodazole the mitochondrial mass measured by TOM22 immunofluorescence was in certain phases about 2-

fold greater than during blockage with serum starvation (Figure 6C and Figure 2E, respectively) and about 50% more than during blockage with double thymidine, Figure 5C. These data are in agreement with the 20 % increase in the mt mass/cell after treatment with nocodazole for 14-15h (but not at shorter times, 8h), measured by Mito tracker Green FM, and flow cytometry by an acridine orange derivative, NAO (37).

The mitochondrial transcripts, measured by mTRANS labelling were about 2.5-fold higher after cell cycle arrest with nocodazole than with the other treatments (Figure 6F and Supplementary Figure S5B). mTRANS levels remained high during all the cell cycle, with the exception of the G2/M phases. After nocodazole treatment, the levels of mtDNA were also significantly higher than after serum starvation (5 to 22-fold in the D-loop region, Supplementary Figure S5A, and 5.7-fold at the 12S locus in the S-phase), and about 2-fold higher than after synchronization by double thymidine (but 4.4-fold higher in G1/S). Interestingly, after treatment with nocodazole the mtDNA content (grey columns, Supplementary Figure S5A) was highly variable during the cell cycle, although to a lesser extent than 7S (white columns, Supplementary Figure S5A), with about a 3-fold decrease at the end of G1 and the highest values at the end of the S-phase. In contrast, after release from serum starvation the mtDNA content decreased once, sharply, (Figure 3E), as reported (1), then it slightly increased until the S-phase and again in G1. Nevertheless under these conditions the mtDNA content remains globally comparable during the cell cycle in agreement with previous findings (27). Thus, differently from serum starvation, nocodazole treatment globally alters the mtDNA content, transcript levels, and the mitochondrial mass, and this is also the case within the various phases of the cell cycle.

## Supplementary Reference

1. Xiong, W., Jiao, Y., Huang, W., Ma, M., Yu, M., Cui, Q. and Tan, D. (2012) Regulation of the cell cycle via mitochondrial gene expression and energy metabolism in HeLa cells. *Acta Biochim Biophys Sin (Shanghai)*, **44**, 347-358.

## Supplementary Figure legends

**Figure S1. Variation in the mitochondrial mass is not necessarily correlated with the cell size.** (A) Graph represents mitochondrial mass (TOM22 immunofluorescence) and cell surface (square pixels) variation, in percentage, at different phase of the cell cycle compared to G0. The cell cycle was synchronized with serum starvation. Red arrows indicate conditions where mitochondrial mass variation does correlated with changes in the cell size. (B) The same analysis as in panel A, performed with cell cycle synchronized with double thymidine and, (C) with nocodazole. With double thymidine synchronization the percentages of TOM22 and cell surface appear to display similar profiles during the cell cycle, however note that in several cases (i.e. 5h and 16h) significant increases of the mitochondrial mass takes place at unchanged cell surface. Note also that with all synchronization procedures the cell surface is severely reduced in G2/M (and when identified, in events B), as expected for cells undergone mitosis, and this is also the case for the mitochondrial mass, indicating redistribution of mitochondria in the two daughter cells. (D) Absolute values of TOM22 fluorescence intensity and cell surface (square pixels, ImageJ, Area Fraction) for conditions shown in panels A-C. N=30 cells, from three independent experiments. Standard error of the mean is also indicated. Absence of direct correlation between mitochondrial mass (TOM22 immunofluorescence) and cell length ( $\mu\text{m}$  of the longest axes) was also observed, not shown. TOM22 fluorescence intensity quantification (absolute values) were shown in Figure 2E (serum starvation), Figure 5C (double thymidine), and Figure 6C (nocodazole).

**Figure S2. Immunofluorescence of nucleoid makers TFAM and Poly during the cell cycle synchronized by serum starvation.** 3D-reconstruction of HeLa cells immunolabelled with **(A)** Poly (green) and **(B)** TFAM (green) during the cell cycle at times indicated on top. Scale bar = 10 $\mu$ m. Quantification of the intensity of fluorescence of Poly and of TFAM are reported in Figure 3C and Figure 4C, respectively.

**Figure S3. Proportion of mREP and mTRANS labelling in mitochondria during the cell cycle synchronized by serum starvation.** **(A)** Proportion of mitochondria engaged in mtDNA initiation of replication during the cell cycle evaluated by percentage of mREP signal (initiation of mtDNA replication) relative to mitochondrial mass (immunolabeling with TOM22). The high levels of mREP/TOM22 at G2/M are largely due to decreased mitochondrial mass probably associated to decreased cell size, in particular at events “B”, which likely represent cells undergone mitosis, rather than to an increase in the mREP signal itself. **(B)** Proportion of mitochondria engaged in mtDNA transcription during the cell cycle evaluated by percentage of mTRANS signal (mtDNA transcription) relative to mitochondrial mass. The high levels of mTRANS/TOM22 at G2/M are largely due to decreased mitochondrial mass probably associated to decreased cell size, rather than to an increase in the mREP signal itself.

**Figure S4. Immunostaining of nuclear PCNA and mitochondrial TOM22 during the cell cycle synchronized by double thymidine and nocodazole.** **(A)** Synchronization by double thymidine. Left panels: 3D-reconstruction of HeLa cells labelled with anti-PCNA (red) at the indicated times after release from the treatment identifies the phase of cell cycle. S-phase occurs at 2h-5h, and a second S-phase appears at 16h. With the other synchronization

procedures a single S-phase was detected in the time intervals analysed. Quantification of PCNA immunofluorescence is shown in Figure 5B. Right panels: 3D-reconstruction of HeLa cells labelled with anti-TOM22 (green) at the indicated times after release from double thymidine treatment. Quantification of TOM22 immunofluorescence is shown in Figure 5C. Scale bar=10  $\mu$ m. **(B)** Synchronization by nocodazole. Left panels: 3D-reconstruction of HeLa cells labelled with anti-PCNA (red) at the indicated times after release from the treatment identifies the phases of cell cycle. Quantification of PCNA immunofluorescence is shown in Figure 6B. Right panels: 3D-reconstruction of HeLa cells labelled with anti-TOM22 (green) at the indicated times after release from nocodazole treatment. Quantification of TOM22 immunofluorescence is shown in Figure 6C. Scale bar =10  $\mu$ m.

**Figure S5. Comparison of replication and transcription related parameters during the cell cycle using different synchronization procedures. (A)** Comparison of DNA replication parameters with three different synchronization procedures. Relative fluorescence intensity levels of PCNA and mREP, and mtDNA content (including 7S DNA) at various times after release from serum starvation, double thymidine, or nocodazole treatment are normalized to serum starvation. For each condition, the phase corresponding to cell cycle arrest is indicated on top of the first column in the left panel. On the Y-axis, relative values are indicated (PCNA 1=200k; mREP 1=100k; mtDNA content, measured as in (27); 1= value 50); the same scales are used for the three conditions to underscore quantitative differences. X-axis is shifted to place S-phases at the same position for the three conditions. PCNA and mREP values are from Figure 2B and Figure 3B, respectively (serum starvation), and from Figure 5 B,C (double thymidine) and Figure 6 B,C (nocodazole). **(B)** Comparison of mtDNA transcription with three different synchronization procedures. Relative fluorescence intensity levels of mTRANS and expression levels of TFAM at various times after release from serum

starvation, or double thymidine, or nocodazole treatments, are normalized to serum starvation. Indications as in panel A. On the Y-axis, relative values are indicated (mTRANS 1=100k; TFAM 1=200k); mTRANS and TFAM values are from Figure 4 (serum starvation) and Figure 5 (double thymidine) and 6 (nocodazole).

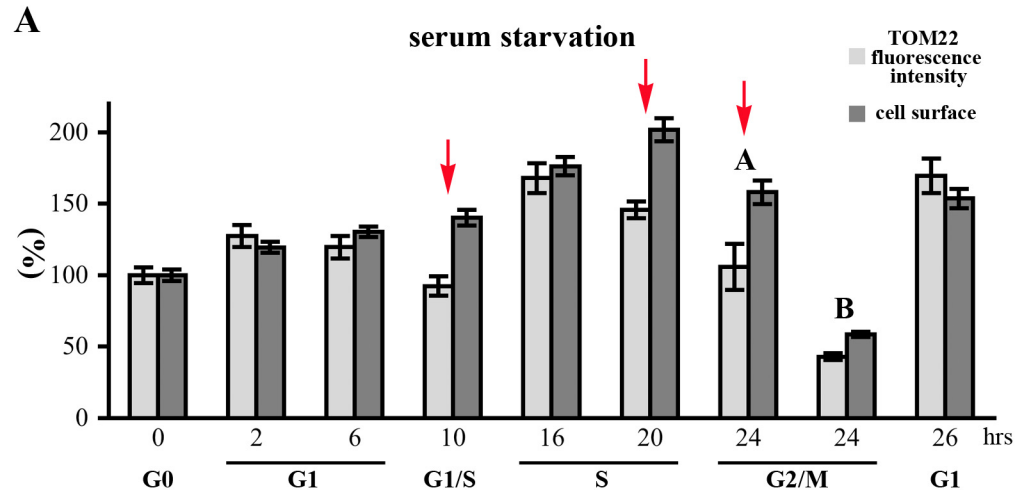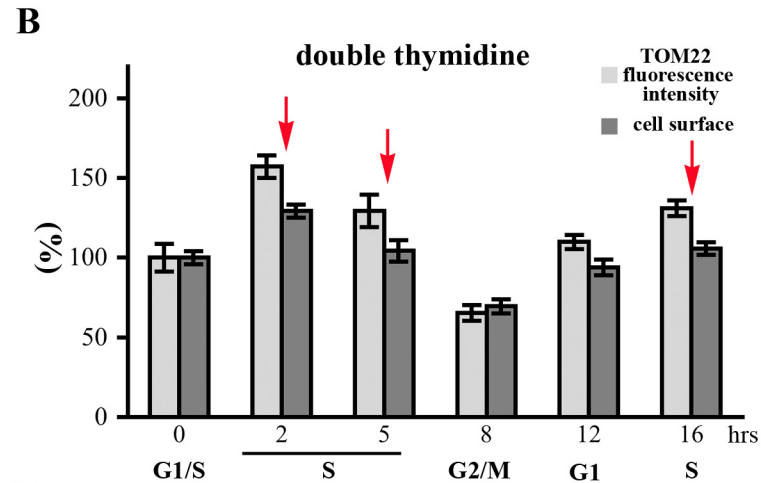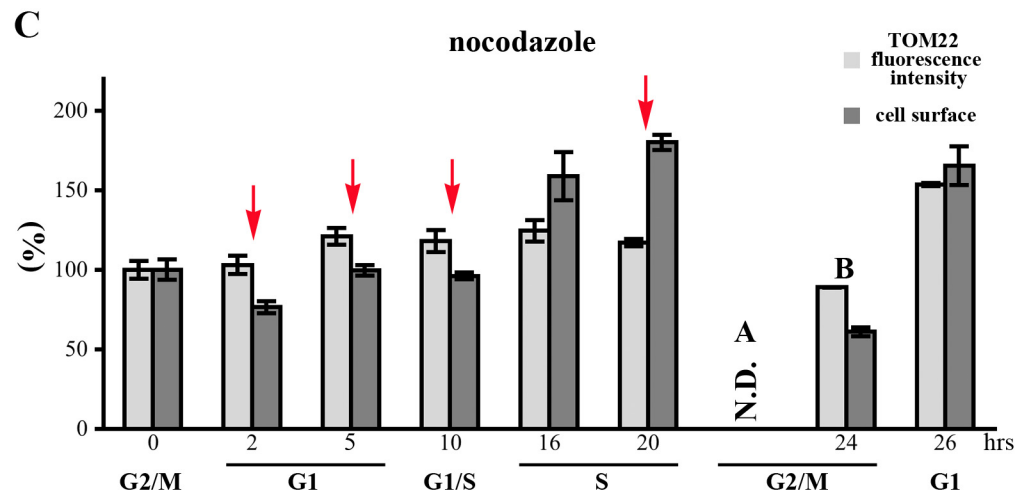

**D**

| serum starvation |                              |              |           |             | nocodazole |                              |              |           |             |
|------------------|------------------------------|--------------|-----------|-------------|------------|------------------------------|--------------|-----------|-------------|
| hrs              | TOM22 fluorescence intensity | Cell surface | TOM22 SEM | Surface SEM | hrs        | TOM22 fluorescence intensity | Cell surface | TOM22 SEM | Surface SEM |
| 0                | 310321                       | 27371        | 17032     | 1083        | 0          | 929629                       | 82664        | 52080     | 5306        |
| 2                | 395586                       | 32703        | 23761     | 1022        | 2          | 958374                       | 63294        | 53703     | 3156        |
| 6                | 371038                       | 35702        | 24387     | 1017        | 6          | 1125519                      | 82352        | 49243     | 2780        |
| 10               | 286580                       | 38352        | 21183     | 1491        | 10         | 1097473                      | 79468        | 63499     | 1758        |
| 16               | 521109                       | 48236        | 32241     | 1780        | 16         | 1157535                      | 131317       | 62752     | 12426       |
| 20               | 452192                       | 55199        | 17719     | 2231        | 20         | 1087999                      | 148940       | 21480     | 3934        |
| 24_A             | 328001                       | 43251        | 49830     | 2257        | 24_A       | ND                           | ND           | ND        | ND          |
| 24_B             | 133253                       | 16045        | 7371      | 512         | 24_B       | 826969                       | 50497        | 29700     | 2299        |
| 26               | 525971                       | 42033        | 37115     | 1878        | 26         | 1427840                      | 136822       | 145172    | 10055       |

  

| double thymidine |                              |              |           |             |
|------------------|------------------------------|--------------|-----------|-------------|
| hrs              | TOM22 fluorescence intensity | Cell surface | TOM22 SEM | Surface SEM |
| 0                | 378103                       | 48459        | 33405     | 1985        |
| 2                | 594234                       | 62628        | 26444     | 2034        |
| 5                | 489354                       | 50575        | 38165     | 3285        |
| 8                | 246900                       | 33674        | 18500     | 2175        |
| 12               | 415427                       | 45550        | 16488     | 2377        |
| 16               | 495428                       | 51239        | 18486     | 1951        |

**Figure S1**

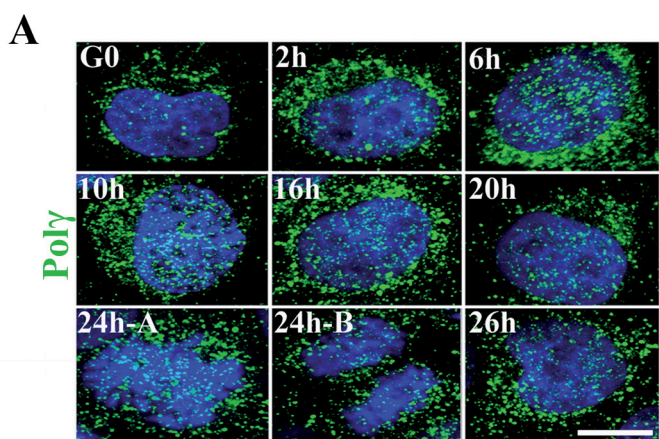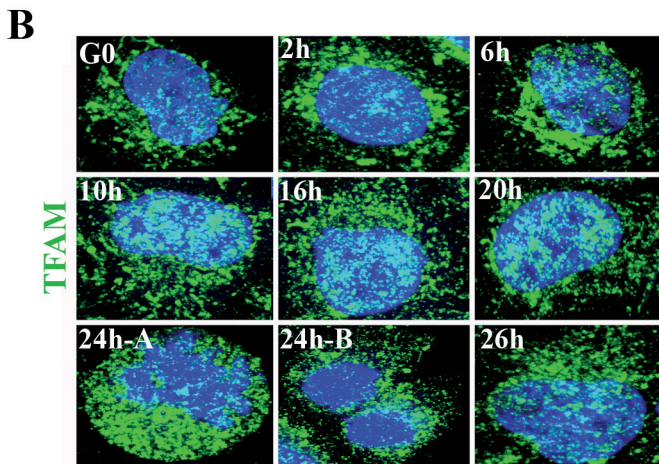

**Figure S2**



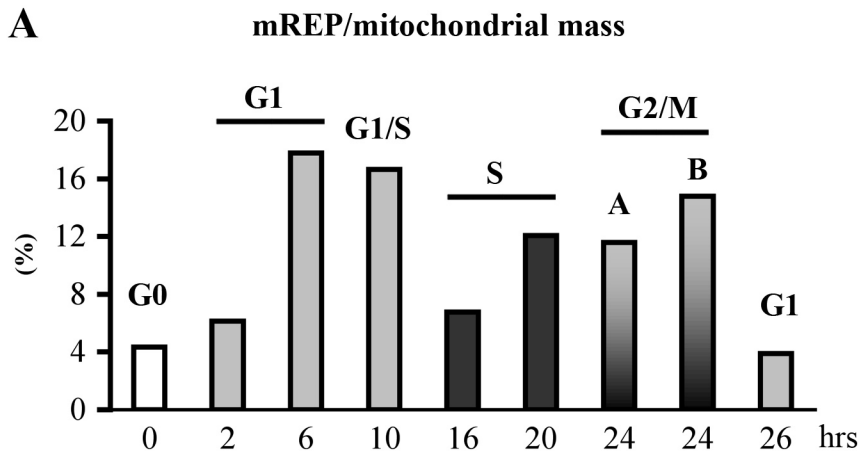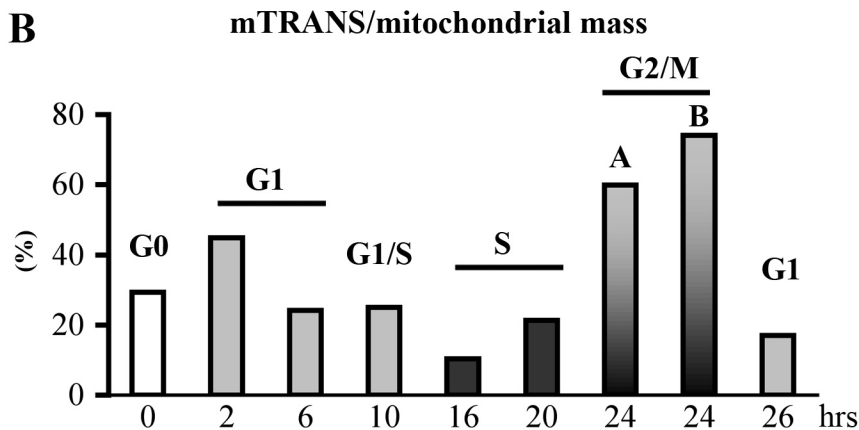

**Figure S3**

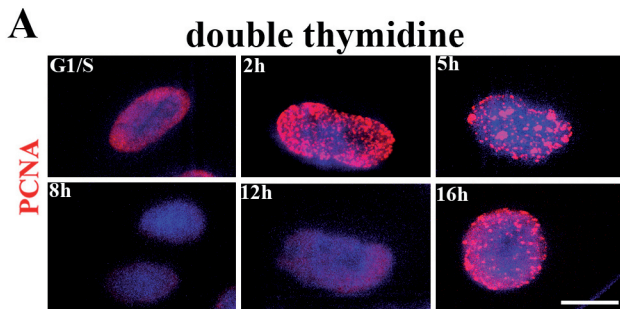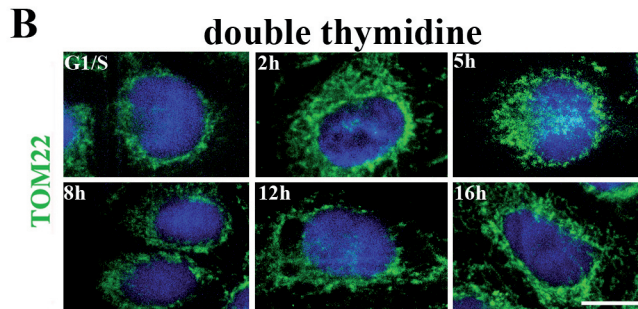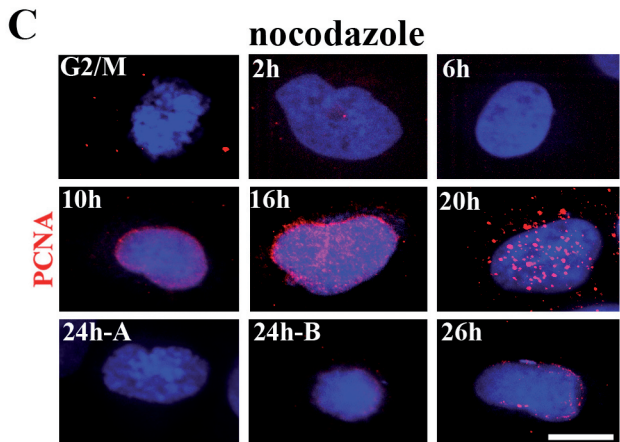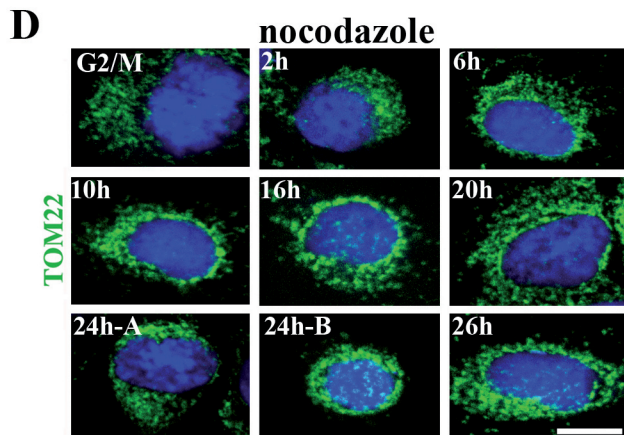

**Figure S4**

**A**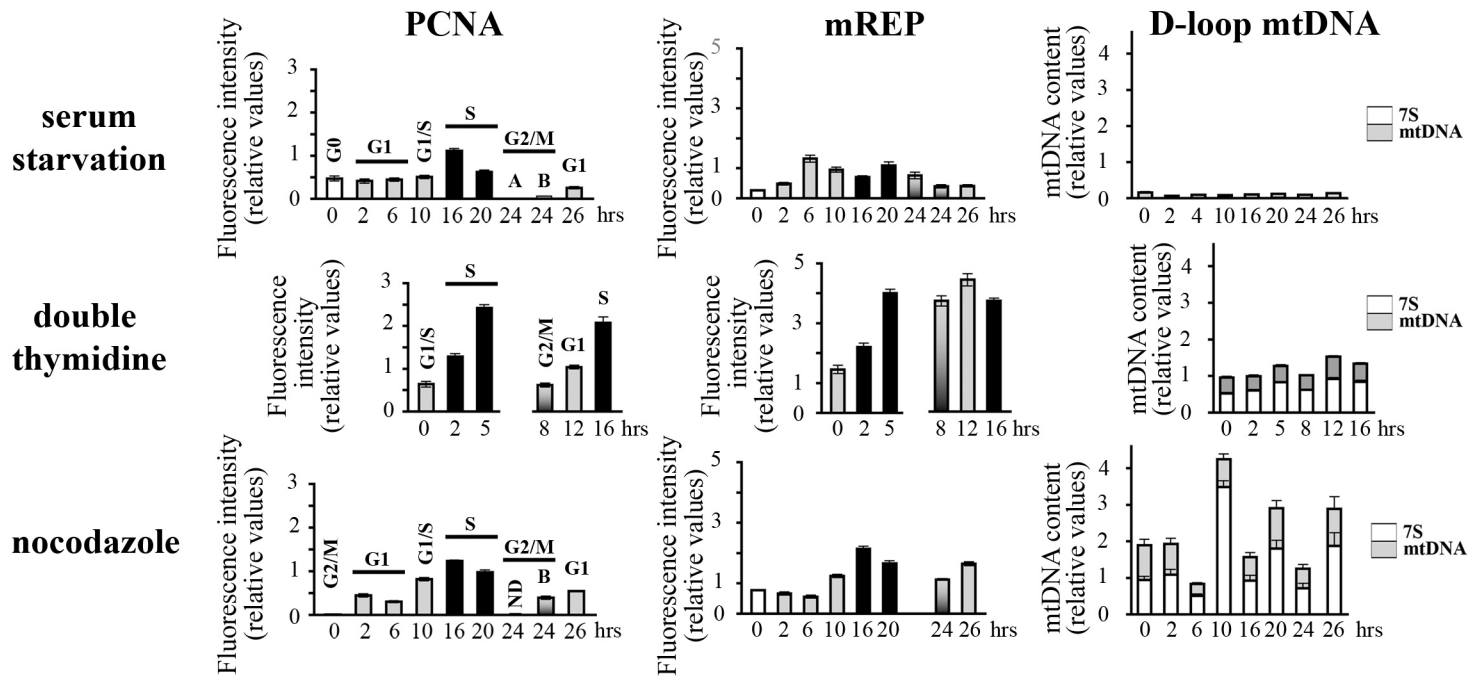**B**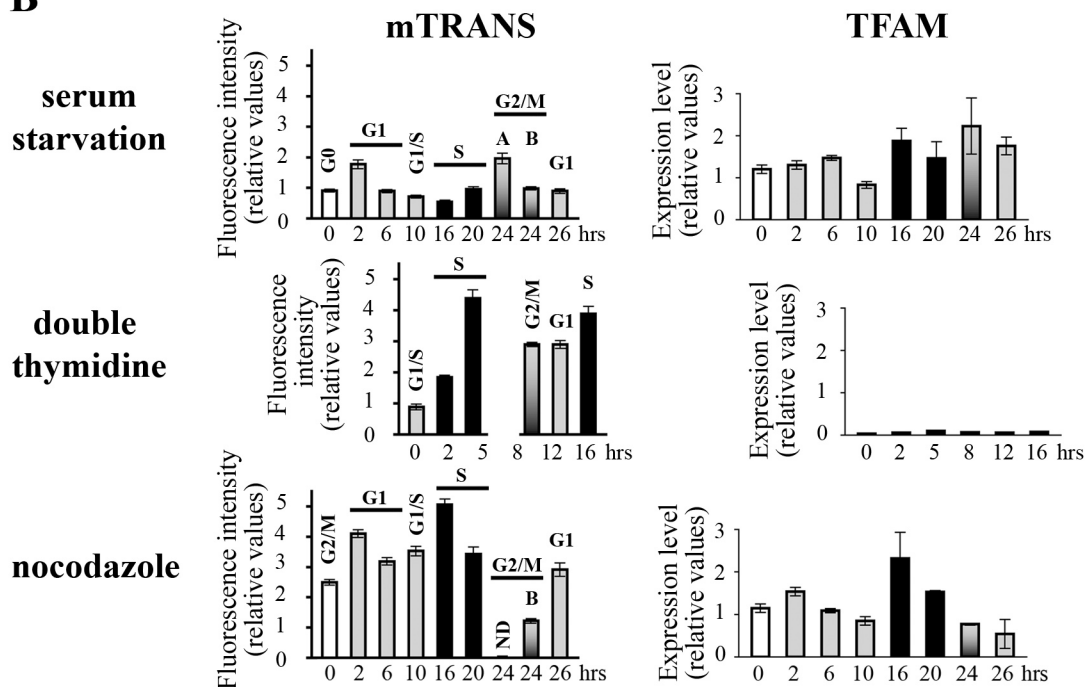**Figure S5**

| Probe | start | end   | size |
|-------|-------|-------|------|
| 1     | 1905  | 2866  | 961  |
| 6     | 7400  | 8518  | 1118 |
| 11    | 13416 | 14836 | 1420 |
| mREP  | 446   | 544   | 98   |

|               |                 |
|---------------|-----------------|
| <b>mTRANS</b> | probes 1, 6, 11 |
|---------------|-----------------|

|                       |       |
|-----------------------|-------|
| human mt genome start | 1     |
| human mt genome end   | 16568 |

**Table S1.** Coordinates of the probes.

The start and end points of probes used for FISH experiments are given on the mitochondrial DNA (NC\_012920, GenBank, was used as reference). This mtDNA is a circular molecule of 16568 bp in size according to the reference above. Mix of more than one probe and their composition are indicated in individual panels below. All probes are oriented in the direction of transcription of the H strand, with the exception of probe ND6 that is in the inverse orientation (transcription on the L strand).

| RT-qPCR primers |                      |                      |                                                            |
|-----------------|----------------------|----------------------|------------------------------------------------------------|
| Probe           | forward primer       | reverse primer       | reference                                                  |
| <b>TBP</b>      | CTCACAGGTCAAAGGTTTAC | GCTGAGGTTGCAGGAATTGA | <i>Mercy et al. 2005. FEBS Journal 272(19):</i>            |
| <b>12S (1)</b>  | CTGCTCGCCAGAACACTACG | TGAGCAAGAGGTGGTGAGGT | <i>Suissa et al. 2009. PLoS Genetics 5(5):e1000474</i>     |
| <b>12S (2)</b>  | AAACTGCTCGCCAGAACACT | CATGGGCTACACCTTGACCT | <i>Uchuimi et al. 2010. NAR 38(16)</i>                     |
| <b>16S (1)</b>  | GTATGAATGGCTCCACGAGG | GGTCTTCTCGTCTTGCTGTG | <i>Suissa et al. 2009. PLoS Genetics 5(5):e1000474</i>     |
| <b>16S(2)</b>   | GCTAAACCTAGCCCCAAACC | TTGGCTCTCCTTGCAAAGTT | <i>Uchuimi et al. 2010. NAR 38(16)</i>                     |
| <b>ND1</b>      | TGGCCAACCTCCTACTCCTC | ATGGCGTCAGCGAAGGGTTG | <i>Suissa et al. 2009. PLoS Genetics 5(5):e1000474</i>     |
| <b>ND2</b>      | ACTGCGCTAAGCTCGCACTG | ATTATGGATGCGGTTGCTTG | <i>Suissa et al. 2009. PLoS Genetics 5(5):e1000474</i>     |
| <b>COI</b>      | ACCCTAGACCAAACCTACGC | TAGGCCGAGAAAGTGTTGTG | <i>Suissa et al. 2009. PLoS Genetics 5(5):e1000474</i>     |
| <b>COII</b>     | ACAGATGCAATTCCTGGACG | GGCATGAAACTGTGGTTTGC | <i>Suissa et al. 2009. PLoS Genetics 5(5):e1000474</i>     |
| <b>ATP8</b>     | ATGCCCCAACTAAATACT   | TTGTGGGGGCAATGAATG   | <i>Uchuimi et al. 2010. NAR 38(16)</i>                     |
| <b>ATP6</b>     | CCCCTTCTTACCACAAGGC  | GTAGGTGGCTGCAGTAATG  | <i>Suissa et al. 2009. PLoS Genetics 5(5):e1000474</i>     |
| <b>COIII</b>    | ACTTCCACTCCATAACGCTC | TGGCCTTGGTATGTGCTTTC | <i>Suissa et al. 2009. PLoS Genetics 5(5):e1000474</i>     |
| <b>ND3</b>      | CTACCATGAGCCCTACAAAC | ACTCATAGGCCAGACTTAGG | <i>Suissa et al. 2009. PLoS Genetics 5(5):e1000474</i>     |
| <b>ND4L</b>     | TATCGCTCACACCTCATATC | AGGCGCAAAGACTAGTATG  | <i>Suissa et al. 2009. PLoS Genetics 5(5):e1000474</i>     |
| <b>ND4</b>      | ACAAGCTCCATCTGCCTACG | TTATGAGAATGACTGCGCCG | <i>Suissa et al. 2009. PLoS Genetics 5(5):e1000474</i>     |
| <b>ND5</b>      | GGTTTCATCCTCGCCTTAGC | ACCTAATTGGGCTGATTTGC | <i>Suissa et al. 2009. PLoS Genetics 5(5):e1000474</i>     |
| <b>CYTB</b>     | CTCCCGTGAGGCCAAATATC | GAATCGTGTGAGGGTGGGAC | <i>Suissa et al. 2009. PLoS Genetics 5(5):e1000474</i>     |
| <b>ND6</b>      | ATTGGTGCTGTGGGTGAAAG | GGATCCTCCCGAATCAACCC | <i>Suissa et al. 2009. PLoS Genetics 5(5):e1000474</i>     |
| <b>NRF1</b>     | GGAGTGATGTCCGCACAGAA | CGCTGTAAAGCGCCATAGTG | <i>Savagner et al. 2003. Biochem Biophys Res Com310(3)</i> |
| <b>POLG</b>     | GAGAAGGCCAGCAGATGTA  | ATCCGACAGCCGATACCA   | <i>Setzer et al. 2008. Am J. Pathol. 172(3)</i>            |
| <b>TFAM</b>     | GACTTCTGCCAGCATAATAC | GAGTTCTGCCTGCTTTATG  | <i>Piechota et al. 2006. Acta Biochim Pol.53(3)</i>        |

#### qPCR primers

| Probe      | forward primer       | reverse primer        | reference                                              |
|------------|----------------------|-----------------------|--------------------------------------------------------|
| <b>18S</b> | GAGAAACGGCTACCACATCC | GCCTCGAAAGAGTCCTGTAT  | <i>Suissa et al. 2009. PLoS Genetics 5(5):e1000474</i> |
| <b>12S</b> | GCTCGCCAGAACACTACGAG | CAGGGTTTGCTGAAGATGGC  | <i>Parone et al. 2008. PLoS One 3(9):e3257</i>         |
| <b>A</b>   | GTGGCTTTGGAGTTGCAGTT | -                     | <i>Antes et al. 2011. NAR 38(19):6466-6476</i>         |
| <b>B1</b>  | -                    | CAGCCACCATGAATATTGTAC | <i>Antes et al. 2011. NAR 38(19):6466-6476</i>         |
| <b>B2</b>  | -                    | GAAGCAGATTTGGGTACCAC  | <i>Antes et al. 2011. NAR 38(19):6466-6476</i>         |

**Table S2. RT-qPCR and qPCR primers.** The sequence of forward and reverse primers for RT-qPCR (upper panel) and qPCR (lower panel) is indicated after the name of the probe that also indicates the gene analysed. Number in parenthesis indicate different sets used to test the same gene. The pair A-B1 amplifies a mtDNA region included in 7S, while the pair A-B2 amplifies a region beyond 7S in the direction of the H-strand (see scheme in Fig. 2E). Reference is indicated in the last column.
